# Supplementary material
Source: MDPI journal article supplement (https://www.mdpi.com/2218-273X/13/3/438)
Supplement: s1 [file s1]

Archive with 1 entries (1 files):
- biomolecules-2091369-supplementary.pdf
