# Supplementary material for: RETRACTED: Tyrosine Kinase Inhibitors Target B Lymphocytes
Source: MDPI journal article supplement (doi:10.3390/biom13030438), 2023-02-25
Supplement: s1 [file s1 › biomolecules-2091369-supplementary.pdf]

Fixed CD19+ cells  
ca.  $2,0 \times 10^5$   
84% selected

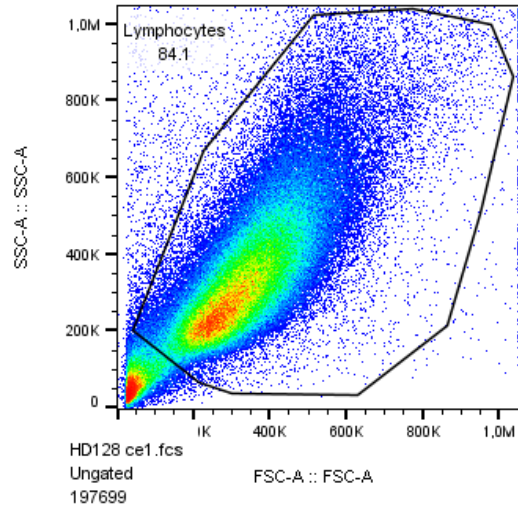

SSC-A  
FSC-A

Single cells  
ca.  $1,6 \times 10^5$   
87% selected

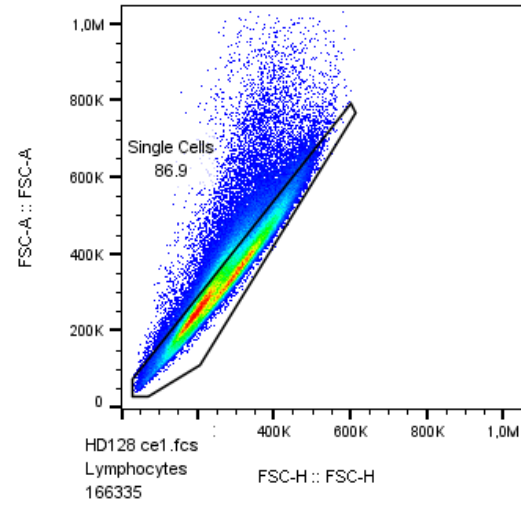

FSC-A  
FSC-H

Live cells  
ca.  $1,4 \times 10^5$   
62% selected

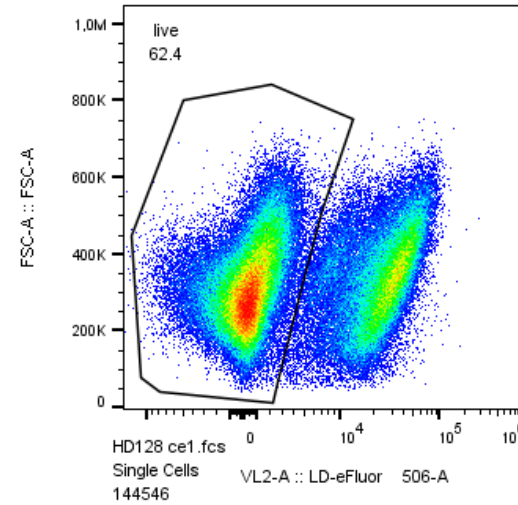

FSC-A  
Dead cells

IRF4+Blimp1+ cells  
ca.  $0,9 \times 10^5$   
42% selected

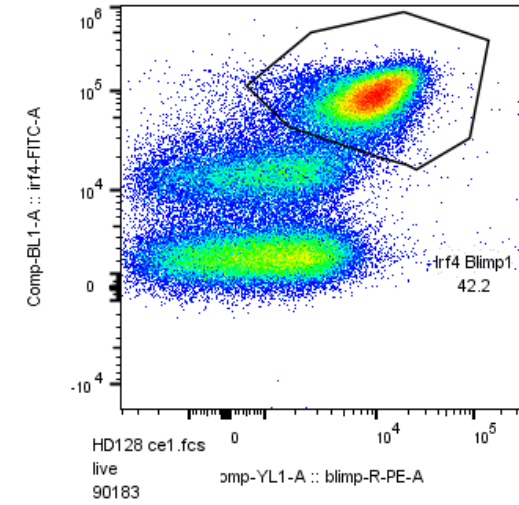

IRF4  
BLIMP1

Figure S1. Example of cell populations used for the assays, including proportion of cells and yield

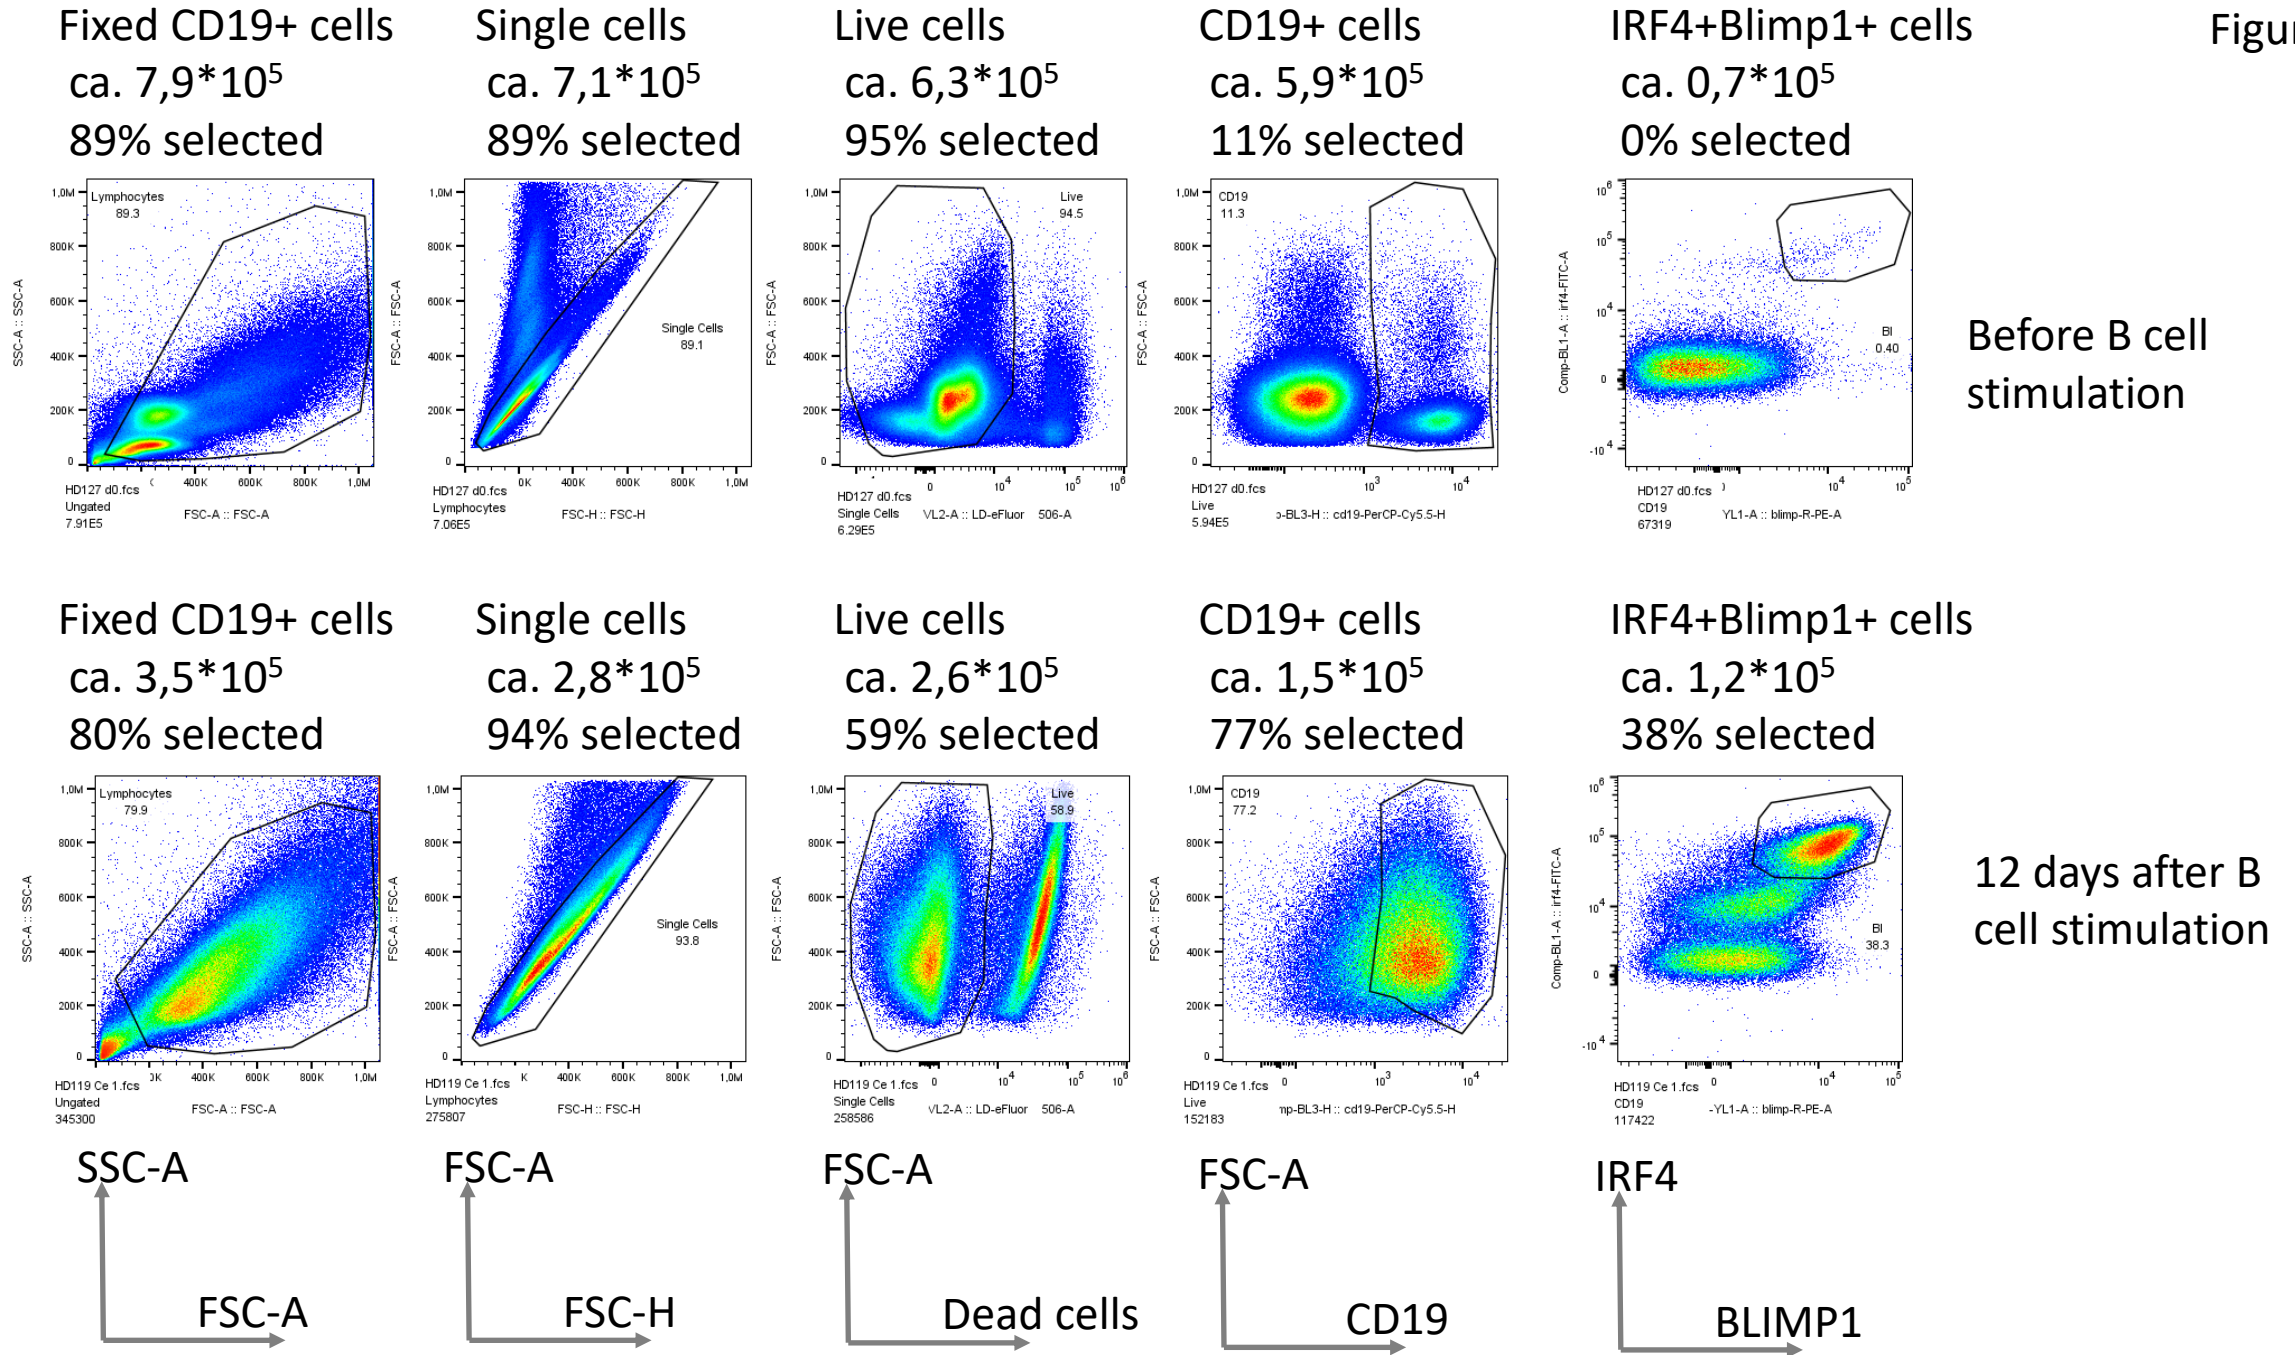

Figure S2. Example of cell populations used for the assays, including proportion of cells and yield

| Experiment # | Alectinib | Brigatinib | Ceritinib | Crizotinib | Entrectinib |
|--------------|-----------|------------|-----------|------------|-------------|
| 1            | 2.0       | 5.5        | 1.7       | 5.9        | 1.4         |
| 2            | 2.2       | 5.7        | 1.8       | 6.2        | 1.4         |
| 3            | 3.5       | 5.7        | 2.0       | 7.5        | 2.9         |
| 4            | 2.1       | 6.2        | 1.5       | 7.2        | 1.5         |
| 5            | 2.5       | 6.4        | 1.6       | 7.7        | 3.2         |
| 6            | 2.6       | 6.3        | 1.7       | 7.9        | 3.1         |
| 7            | 2.4       |            | 2.0       |            | 5.4         |
| 8            |           |            | 1.7       |            | 4.5         |
| 9            |           |            | 1.8       |            | 4.7         |
| 10           |           |            | 2.1       |            | 5.4         |
| Average±SEM  | 2.5±0.2   | 6.0±0.2    | 1.8±0.1   | 7.1±0.3    | 3.4±0.5     |

Figure S3. Summary of several experiments as presented on Figure 1, including Average ± SEM
